**Activation of TAp73 and inhibition of thioredoxin reductase for improved  
cancer therapy in *TP53* mutant pancreatic tumors**

Pilar Acedo<sup>1</sup>, Aristi Fernandes<sup>2</sup> and Joanna Zawacka-Pankau<sup>1,&</sup>

<sup>1</sup>Department of Microbiology, Tumor and Cell Biology, Karolinska Institutet,

Biomedicum, Solnavägen 9, 141 8671 65, Stockholm, Sweden

<sup>2</sup>Department of Medical Biochemistry and Biophysics, Karolinska Institutet,

Biomedicum, Solnavägen 9, 171 65, Stockholm, Sweden

& correspondence: [joannazawackapankau1@gmail.com](mailto:joannazawackapankau1@gmail.com)

**Key words:** protoporphyrin IX, benzoporphyrin derivative, TAp73, mutant p53,  
apoptosis, ROS, TrxR1

## Abstract

The p73 is a tumor suppressor and belongs to the p53 family of proteins. Transcriptionally active (TA) isoform of p73 recognizes similar group of target genes with p53 and can compensate for p53 loss in inducing apoptosis in tumors in response to genotoxic stress or small-molecule treatment.

Pancreatic ductal adenocarcinoma (PDAC) is among the most lethal human cancer types. PDAC is characterized by the late onset of the disease and poor responsiveness to the existing therapies. *TP53* gene mutations score second top and occur in around 75% cases. Consequently, PDAC has very low overall survival rates.

Here, using drug-repurposing approach, we found that protoporphyrin IX (PpIX) and benzoporphyrin derivative monoacid ring A (BPD, verteporfin®), applied in photodynamic therapy of cancer, activate TAp73 and induce apoptosis in pancreatic cancer cells. We also found that PpIX and BPD trigger accumulation of reactive oxygen species and inhibit an antioxidant defense enzyme, thioredoxin reductase 1 (TrxR1). We demonstrated that PpIX and BPD inhibit TrxR1 both *in vitro* and in cells.

In conclusion, our study shows that PpIX and BPD target cancer cells' vulnerabilities, namely activate TAp73 tumor suppressor and inhibit TrxR1 redox balance enzyme to overcome p53 loss.

Our findings, may in future contribute to repurposing of PpIX and verteporfin® to treat pancreatic cancer patients.

## Introduction

Pancreatic cancer is one of the deadliest diseases and the 5<sup>th</sup> leading cause of cancer-related deaths worldwide[1]. In Europe, the death rates from pancreatic cancer continue to increase in both sexes, and the median survival rate for patients diagnosed with metastatic disease is only 4.6 months[2]. At present, pancreatic cancer is the 4<sup>th</sup> leading cause of death in Europe and is predicted to be the 2<sup>nd</sup> cause of cancer-related deaths in 2020[3].

To date, it is still one of the most challenging solid tumors to treat. Most of the patients die within 1 year after diagnosis and only about 3-5% survive up to 5 years in the USA. This is due to the late onset of the disease, high incidence of metastasis and the lack of the effective treatment[4].

Treatment of pancreatic cancer is difficult and depends on the stage of the disease at the time of diagnosis. The response to the currently available chemotherapeutics is disappointing and the poor outcome is likely stemming from a complex set of several factors described below.

In cases not suitable for the resection with curative intent, palliative chemotherapy may be used to improve the quality of life. Gemcitabine (GEM) was approved by the Food and Drug administration in 1998 for the treatment of patients with advanced pancreatic cancer. GEM remains the main first-line therapy for pancreatic patients regardless of the occurrence of primary and acquired resistance. The resistance is partially due to DNA-repair polymorphism[5], mutations in p53 pathway[6] or the existence of cancer stem cells[7]. Recently, combination treatments regiments with 5-fluorouracil, irinotecan and oxaliplatin (FOLFIRINOX) brought

some promise to overcome the resistance in patients suffering from metastatic disease, however, pancreatic cancer remains a major medical unmet need[8].

Thus, there is an urgent need to develop more effective treatments for this type of cancer.

Pancreatic cancer is one of the cancer types in which mutant p53 impacts disease progression. *TP53* is mutated in 75% cases of pancreatic carcinomas [9]. *TP53* gene mutations co-exist with activating mutations in classical oncogenes including *K-Ras*, which accounts for 45% of all pancreatic cancer cases [10].

*TP53* mutations are common across various tumor types and result with the loss of p53 tumor suppressor function and preferentially promote the so-called gain of new functions. As evidenced, mutant p53 is the main driver of disease progression in pancreatic cancers and selective therapies aiming at restoring p53 pathway to overcome p53 loss in cancer cells but not in normal cells, appear to be an attractive strategy for such diseases as chemotherapy-resistant pancreatic cancer. Despite the ongoing efforts, small molecules re-activating mutant p53 are still in clinical development[11].

It has been previously shown that photodynamic therapy of cancer (PDT), that uses photoinducible compounds and light, is effective against numerous pancreatic cancer cell lines alone[12] or in combination with gemcitabine[13].

The majority of the compounds that are applied in clinics in PDT are porphyrins and their derivatives[14]. Protoporphyrin IX (PpIX) is a metabolite of  $\gamma$ -aminolevulinic acid (ALA), a pro-drug applied in photodynamic therapy of cancer[14]. Protoporphyrin IX, itself, without light excitation, was shown to induce wild-type p53-related cell death in several human cancer cell lines including human colon carcinoma[15]. Next, it has recently been demonstrated that PpIX stabilizes and

activates TAp73 and induces TAp73-dependent apoptosis in cancer cells lacking *TP53*[16].

Thioredoxin reductase 1 (TrxR1) is a component of Thioredoxin system responsible for maintaining redox homeostasis in cells[17]. TrxR has a protective role against cancer in normal cells, however, can contribute to tumor progression once the disease has already developed. Thus, *TXNRD1* is often overexpressed in cancers and is a promising target for improved cancer therapy[17].

Here, we found that protoporphyrin IX and benzoporphyrin derivative (BPD; verteporfin®) induce TAp73 and its pro-apoptotic targets on mRNA and protein levels. Next, it was demonstrated that PpIX and BPD induce reactive oxygen species (ROS) and antioxidant response genes *HMOX-1* and *NQO1*. PpIX and BPD inhibited TrxR1 *in vitro* and in pancreatic cancer cells harboring mutant p53. Taken together, our data adds up to the mechanism by which PpIX and now BPD induce apoptosis in cancer cells harboring *TP53* gene mutations, which is via reactivation of TAp73 tumor suppressor and inhibition of TrxR1.

## Results

### **Protoporphyrin IX and benzoporphyrin derivative localize to cytoplasm of Panc1 cancer cells.**

Pancreatic ductal adenocarcinomas (PDAC) are cancers of poor clinical outcome due to chemoresistance and disease relapse and mutant p53 drives disease aggressiveness. Whether the re-activation of TAp73 can compensate for the p53 loss in cancers with *TP53* gain of function mutations has not been unequivocally demonstrated yet. For this reason, we tested the outcome of TAp73 activation in PDAC cancer cell lines harboring hot-spot *TP53R273H*.

First, we have assessed cellular localization of BPD in Panc1 cells (Fig. 1a). Fluorescence microscopy indicated that BPD is uptaken to high degree by cancer cells. Next, we found that verteporfin localized in large in cytoplasm and partially in endoplasmic reticulum.

**PpIX and BPD inhibit proliferation of PDAC cells but not of non-transformed human ductal epithelial cells.**

To assess the impact of PpIX and BPD on the proliferation of PDAC cells we performed MTT proliferation assay. Standard treatments for advanced disease include monotherapy with gemcitabine (GEM) and we used it for comparative purpose.

MTT assay showed that PpIX and BPD inhibit cancer cells' proliferation (Fig. 1b-e). In agreement with previous data, cancer cells expressing wild-type (wt) p53 (PaCa3) were sensitive to 72h-treatment with PpIX [15] (Fig. 1b) and showed enhanced growth inhibition upon BPD exposure. Interestingly, mutant p53-harboring cells (Panc1) were more sensitive to PpIX than PaCa3 cells and slightly less sensitive to BPD (Fig. 1c).

The calculated  $IC_{50}$  was 4.4  $\mu$ M for PaCa3 (wtp53) cells and 3.5  $\mu$ M Panc1 (mtp53R273H) cancer cells for PpIX and 2.2 and 2.8  $\mu$ M for BPD, respectively.

Of note, murine pancreatic cancer cells Panc02 and human MiaPaCa2, were less sensitive to PpIX and BPD at the range of the concentrations tested (Fig. 1d and data not shown) and normal human epithelial ductal cells were insensitive (Fig. 1e). On other hand, all cell lines were highly susceptible to low dose (25  $\mu$ M) cisplatin and 5  $\mu$ M gemcitabine.

Consistent with previous data wtp53 cancer cells were sensitive to PpIX [15]. Next, mutant p53 Panc1 cell line was the most sensitive among the cells tested. Based on the above and the previous studies, we selected Panc1 cell line and 2.5 $\mu$ g/ml

compounds' concentration for further studies on cell death induction upon reactivation of TAp73.

### **PpIX and BPD induce apoptosis in PDAC cells**

To investigate if growth inhibition observed in MTT assay is a consequence of the apoptosis, we have treated PaCa3 and Panc1 cells with 2.5 µg/ml PpIX or BPD for 48 h and performed propidium iodide and Annexin V stainings. We found that at the time-point tested, Panc1 undergo high late apoptosis after PpIX treatment as demonstrated by above 40% increase of PI positive cells. At this time-point, Annexin V positivity, indicating early apoptosis, increased by 12% or 9% after PpIX or BPD treatments (Fig. 2c,d). In PaCa3 cells, harboring wtp53, we observed 10% and 17% increase in PI positive cells after PpIX or BPD treatment respectively. The increase in Annexin V-positive cells was 5% for PpIX and 11% for BPD. Thus, both compounds induce early and late apoptosis in cancer cell lines tested.

### **PpIX and BPD induce TAp73 and its pro-apoptotic targets**

It has been demonstrated that PpIX reactivates TAp73 tumor suppressor and induces TAp73-dependent apoptosis in *TP53*-null cancer cells[16]. To assess if the growth inhibition of PDAC by PpIX and BPD is a result of apoptosis, we evaluated the expression of TAp73 and its pro-apoptotic targets in two pancreatic cancer cells lines. Western blotting results showed that in dark, both PpIX and BPD induce TAp73 levels, which correlates with the accumulation of its proapoptotic Bcl-2 protein family members (PUMA, Bax, and Bid) (Fig. 3a,b,c) and cleaved PARP. In Panc1 cells PpIX and PBD upregulate the expression of Bax, Bid, puma, noxa (Fig. 3d). This indicates that cell apoptosis is due to activation of TAp73. Interestingly, we detected

activation antioxidant response proteins, HO-1, and NF-E2-related transcription factor (Nrf2) (Fig. 3a,b,c,d). PpIX and BPD did not induce PARP cleavage, TAp73 and its proapoptotic targets at the effective concentrations (Fig. 3e).

### **PpIX and BPD induce reactive oxygen species in PDAC.**

We observed accumulation of antioxidant response proteins by PpIX and BPD in PDAC cells; we thus sought to investigate if PpIX and BPD trigger accumulation of reactive oxygen species. We assessed the levels of ROS using DCFDA and HE probes. Fig. 4a,b,c shows that PpIX and BPD induce ROS in PaCa3 and Panc1 cancer cells. Pre-treatment with ROS scavenger, resveratrol inhibited accumulation of ROS by PpIX and BPD in Panc1 cells (Suppl. Fig. 1a). Importantly, the compounds did not induce ROS in HPDE cells (Suppl. Fig. 1b).

### **PpIX and BPD are inhibitors of thioredoxin reductase**

Protoporphyrin IX was first identified as an inhibitor of thioredoxin reductase in the *in vitro* screen [18]. Since we observed significant induction of ROS in cells treated with PpIX or BPD we reasoned that apart from active apoptosis, inhibition of TrxR might contribute to elevation of ROS in cancer cells.

As demonstrated in Fig. 5a, recombinant TrxR was inhibited by BPD. To assess if PpIX and BPD inhibit TrxR activity in cells, we treated Panc1 with PpIX or BPD for 6 h and assayed the activity using end-point Trx-dependent insulin reduction assay. PpIX and BPD treatment inhibited TrxR1 in Panc1 cells (Fig. 5b) and in other mutant p53 harboring cell line, MiaPaCa2. Taken together, these data demonstrates that BPD is a potent inhibitor of TrxR in pancreatic cancer cells.



## Discussion

Several protein kinases inhibitors were reported to have off-target effects. In example, BRAF inhibitor, vemurafenib used for metastatic melanoma[19] with good clinical outcome in some cases[20], was manifested to induce unusual photosensitivity in patients[21]. The recent study by Klaeger *et al.* [22] demonstrates that several clinically applied kinase inhibitors including vemurafenib, in addition to their designed targets effectively inhibit ferrochelatase, the last enzyme in heme biosynthesis. The authors speculated that accumulation of protoporphyrin IX may lead to photosensitivity of the patients upon treatment with kinase inhibitors.

Next, PpIX is a metabolite of  $\gamma$ -aminolevulinic acid (ALA), heme precursor, a drug applied in photodynamic therapy of cancer [14].

We have shown in a drug-repurposing approach that PpIX re-activates wild-type p53 and TAp73 and induces apoptosis in cancer cells. The mechanism is *via* inhibition of p53/MDM2 and TAp73/MDM2(X) interactions [15, 16]. Next, PpIX was identified in the *in vitro* screen as a potent, competitive inhibitor of thioredoxin reductase[18]. Thus, here we speculated that PpIX exogenously delivered to pancreatic cancer cells induces apoptosis *via* activation of p53 protein family members and inhibition of TrxR.

The detailed analysis revealed that PpIX and its clinically applied analog, BPD also known under commercial name verteporfin®, inhibit proliferation of pancreatic cancer cells without affecting non-transformed cells. The mechanism of growth inhibition was by induction of apoptosis. Next, both compounds triggered antioxidant response and induced accumulation of reactive oxygen species only in cancer cells but not in normal HPDE cells. The above, prompted us to investigate if robust induction of ROS is a consequence of inhibition of TrxR. According to our findings,

BPD inhibited enzymatic activity of recombinant thioredoxin reductase. Both, PpIX and BPD inhibited the enzyme in Panc1 and MiaPaCa2 cancer cells as demonstrated by Trx-dependent end point insulin reduction assay.

Inhibitors of TrxR are currently under pre-clinical development and are promising candidates for cancer treatment [23]. Several small molecules activating wild-type or mutant p53 were also shown to inhibit TrxR [24-26]. The small molecule, APR-246, a mutant p53-reactivating compound in Phase II clinical development, is a pro-drug, converted in cells to methylene quinuclidinone (MQ) [27]. MQ is a Michael acceptor and was demonstrated to react with cysteines in p53 [28] and with selenocysteine (Sec) residues in the C-terminal motif of TrxR1[25]. Our findings clearly demonstrate that PpIX and BPD inhibit TrxR. The mechanism by which this occurs remains to be elucidated. Structural studies on heme-binding protein, heme oxygenase 2 (HO-2), revealed that in the oxidized state of cysteine residues in apoprotein, heme binds 2.5 fold more tightly than in the reduced state [29]. This, together with the finding that the Sec-to-Cys mutant of TrxR1 was resistant to inhibition by PpIX [18], strongly imply that Sec residue in TrxR might be the binding site of PpIX and BPD (verteporfin®).

Our findings might have important clinical implication and support fast repurposing of porphyrins in treating pancreatic cancer patients harboring *TP53* mutations. Firstly, the reactivation of TAp73 and inhibition of TrxR might help to predict the response of patients to PpIX or BPD. Next, dual targeting of TAp73 and TrxR might bring additional advantage in overcoming the development of treatment-resistant disease. In particular, we foresee that parallel reactivation of TAp73 and inhibition of TrxR will significantly increase the stress burden in cancer cells when compared to separate approaches, which will contribute to selective tumor killing while leaving normal cells unaffected.

## **Materials and methods**

### **Cell culture**

Human pancreatic cancer cell lines, Paca3, MiaPaca2, Panc1 were kindly provided by Dr. Rainer Heuchel from Karolinska Institutet, Sweden. Murine pancreatic cancer cells Panc02 cells were provided by Dr. Maximilian Schnurr from University of Munich, Germany and made available for this project by Dr. Yihai Cao from Karolinska Institutet, Sweden.

Normal pancreatic cells immortalized by HPV transformation (HPDE)[30] were provided by Dr. Rainer Heuchel from Karolinska Institutet, Sweden. Cells were maintained in D-MEM medium supplemented with 10% fetal bovine serum and penicillin/streptomycin solution (Sigma-Aldrich, Germany). The cells were cultured at 37°C in a humidified incubator with 5% CO<sub>2</sub>. The cell lines were routinely checked for mycoplasma during the whole duration of the project.

### **Chemicals**

Protoporphyrin IX and benzoporphyrin derivative were purchased from Sigma-Aldrich, Germany, dissolved in 100% DMSO (Sigma-Aldrich, Germany) to final concentration 2 mg/ml and stored in the dark in amber tubes.

Cisplatin (CDDP) (Sigma-Aldrich, Germany) was dissolved in 0.9% NaCl to 25  $\mu$ M and used at final concentration 20  $\mu$ M. Resveratrol (Enzo Biochem, NY, USA) was reconstituted to 40 mM in 100% DMSO, aliquoted and stored at -20°C.

MTT reagent (Sigma-Aldrich, Germany) was reconstituted in PBS (prepared from 1x tablets Sigma-Aldrich, Germany) to 5 mg/ml, filter-sterilized and stored at +4°C for a week.

Gemcitabine (2',2'-difluoro-2'-deoxycytidine, GEM) (Abcam, UK) was prepared as 1 mM stock solution in 100% DMSO.

### **Verteporin uptake and cellular localization**

Cells were incubated with 2.5 µg/ml of BPD in cell media for 3h, washed three times with PBS and co-stained with ER-tracker Green for live-cell imaging (Molecular probes) or DAPI (Molecular Probes) according to manufacturer protocol. BPD was excited with 420 nm. The images were taken using Olympus IX-71 microscope and DeltaVision SoftWoRx.

### **Cell viability**

Cell viability was assessed by MTT assay as provided by the manufacturer (Sigma-Aldrich, Germany) and as described previously[15]. Briefly, 3000 cells were seeded in 96-well plate and allowed to adhere overnight. The cells were treated with compounds for 72 h and the viability was measured using MTT reagent.

### **Real-time PCR**

Quantitative PCR was performed as described previously[31]. Cells were seeded at 6-well plates, allowed to adhere and treated with 2.5 µg/ml PpIX or BPD. mRNA after isolation was reverse transcribed to cDNA according to the manufacturer's instructions (Bio-Rad, Sundbyberg, Sweden). For qPCR reaction 150 nM; 10 ng cDNA; 7.5 µl 2 × master mix (Bio-Rad) and water to a total of 15 µl were used. Primers used: *GAPDH* forward: TCATTCCTGGTATGACAACG and reverse: ATGTGGGCCATGAGGT , *NOXA*(PMAIP1) forward 5'-AAGTGCAAGTAGCTGGAAG-3', reverse: 5'-TGTCTCCAAATCTCCTGAGT-3', *PUMA* forward: 5'-CTCAACGCACAGTACGAG-3' and reverse: 5'-GTCCCATGAGATTGTACAG-3', *NFLE2E* forward: 5'-

TCCCAGCAGGACATGGATTT-3' and reverse: 5'-  
GCTCATACTCTTTCCGTCGC-3', *HMOX-1* forward: 5'-  
TTCACCTTCCCCAACATTGC-3' and reverse: 5'-  
TATCACCTCTGCCTGACTG-3', *Bid* forward: 5'-  
GTGAGGTCAACAACGGTTCC-3' and reverse: 5'-  
TGCCTCTATTCTTCCCAAGC-3', *Bim* forward: 5'-  
TGGCAAAGCAACCTTCTGATG-3' and reverse: 5'-  
GCAGGCTGCAATTGTCTACCT-3', *Bax* forward: 5' –  
GCTGTTGGGCTGGATCCAAG – 3' and reverse: 5' –  
TCAGCCCATCTTCTTCCAGA – 3'

#### **Thioredoxin reductase activity assay**

For the enzymatic activity of purified TrxR we followed the protocol previously described[24, 32]. Briefly, 10 nM of purified TrxR1[33] was pre-incubated with BPD at the indicated concentrations (0–20  $\mu$ M) in 50  $\mu$ l PE-buffer supplemented with 150  $\mu$ M NADPH for 30 min at room temperature. Next, 2.5 mM DTNB and 150  $\mu$ M NADPH were added to the samples just before measurement. DTNB reduction was performed for 6 min by detection of TNB anion formation detected as a change in the absorbance at 412 nm.

For cellular TrxR activity Panc1 and MiaPaCa2 cells were treated with PpIX or BPD for 6 h after which they were harvested and re-suspend in TE buffer containing protease inhibitors cocktail (cOmplete, mini protease cocktail tablets, Roche, Sweden). Cells were sonicated and the total protein concentration of the supernatant was determined with a Bradford reagent kit (Bio-Rad Laboratories, Solna, Sweden). Cellular TrxR1 activity was determined using the previously described end-point Trx-dependent insulin reduction assay, as previously described[32]. Briefly, total cellular

protein (20  $\mu$ g) was incubated with 15  $\mu$ M recombinant human wild-type Trx in the presence of 297  $\mu$ M insulin, 1.3 mM NADPH, 85 mM Hepes buffer, pH 7.6, and 13 mM EDTA for 30 min at 37°C, in a total volume of 50  $\mu$ l. The reaction was stopped by the addition of 200  $\mu$ l of 7.2 M guanidine-HCl in 0.2 M Tris-HCl, pH 8.0, containing 1 mM DTNB. The activity was then determined by measuring absorbance at 412 nm using a VersaMax microplate reader (Molecular Devices, Sunnyvale, CA, USA) with a background absorbance reference for each sample containing all components except purified TrxR, incubated and treated in the same manner.

### **Cell death detection**

Propidium iodide and FITC-Annexin V (from BD Biosciences, San Jose, CA, USA) staining was performed according to the manufacturer's protocols and FACS analysis was performed with the CELLQuest software (CELLQuest, Franklin Lakes, NJ, USA) as described previously[34].

### **ROS measurement**

Reactive oxygen species were detected using 2',7'-dichlorofluorescein (H<sub>2</sub>DCF) (Sigma-Aldrich, Germany) and method described previously[24].

Hydroethidine staining was performed according to the manufacturer protocol (Life Technologies, Sweden). Data analysis was performed with the CELLQuest software (CELLQuest, Franklin Lakes, NJ, USA).

### **Western blotting**

Western blotting was performed according to the standard protocol. Briefly, 100  $\mu$ g of total cell lysate was subjected to electrophoresis, after transfer the following antibodies were used to detect proteins: anti-TAp73 (Bethyl Laboratories, TX, USA),

anti-BAX (Santa Cruz Biotechnology, Germany) anti-PUMA (Merck, MA, USA), anti-HO-1 (Santa Cruz Biotechnology), anti-NRF2 (Santa Cruz Biotechnology, Germany), anti-Bid (Santa Cruz Biotechnology), and anti-actin (Sigma-Aldrich, Germany), anti-PARP (Santa Cruz Biotechnology, Germany), anti-actin (Sigma-Aldrich, Germany).

### **Conflict of Interest**

The authors declare no conflict of interest.

### **Acknowledgement**

The authors would like to acknowledge the financial support from KI/MDACC Sister Institution Funds, The Strategic Research Programme in Cancer, Stockholm Läns Landsting and Åke Wibergs stiftelse.

Special thanks are addressed to Dr. Alicja Sznarkowska from University of Gdansk for helpful discussions. We would like to thank all our colleagues for sharing their reagents.

### **Figures legends**

#### **Figure 1. BPD is uptaken and inhibits proliferation of pancreatic cancer cells.**

- (a) BPD localizes to cytoplasm and partially to endoplasmic reticulum in Panc1 cancer cells. The nucleus was stained with DAPI and endoplasmic reticulum with ER-tracker. The image is a representative data of three independent experiments.
- (b) PpIX and BPD treatment for 72 hours inhibit proliferation of PaCa3, Panc1 (c) and Panc02 (d) cancer cells as assessed by MTT assay.

(e) PpIX and BPD do not inhibit proliferation of HPDE cells as assessed by MTT assay.

**Figure 2. PpIX and BPD activate early and late apoptosis**

(a) 2.5 µg/ml PpIX and BPD induced late (PI staining) and early apoptosis (FITC-Annexin V) (b) in wtp53 PaCa3 cells after 48 hrs (n=3). 20 µM CDDP was applied as a positive control.

(b) Treatment with 2.5 µg/ml PpIX and BPD for 48 hrs induced late (PI staining) and early apoptosis (FITC-Annexin V) (d) in mtp53 Panc1 cells (n=3). 20 µM CDDP was used as a positive control.

**Figure 3. Reactivation of TAp73 by PpIX and BPD induces apoptosis in pancreatic cancer cells.**

(a) PpIX and BPD (induce 2.5 µg/ml) PARP cleavage in PaCa3 cells and in Panc1 cells (b, c) in a time dependent manner. This correlates with stabilization of TAp73 and its pro-apoptotic target Bax. Both compounds upregulate heme oxygenase (HO-1) and its transcriptional regulator Nrf2 protein. 20 µM CDDP was used as a positive control. FL – full length; CL – cleaved.

(d) Treatment with PpIX and BPD increased mRNA levels of apoptotic proteins and antioxidant response proteins in Panc1 cells.

(e) PpIX and BPD treatment did not induce TAp73 nor apoptotic proteins in non-transformed pancreatic cells.

**Figure 4. PpIX and BPD induce ROS in pancreatic cancer cells.**

(a) BPD significantly increased ROS levels in PaCa3 cells as estimated by DCFDA measurement 16 h post-treatment (n=3).



(b) (c) Both, PpIX and BPD, induced ROS in Panc1 cells as assessed by DCFDA staining (n=3).

**Figure 5. BPD inhibits thioredoxin reductase activity.**

(a) BPD ablates activity of recombinant TrxR. Representative data of three independent experiments is shown.

(b) Both, PpIX and BPD inhibit TrxR in Panc1 and MiaPaCa2 pancreatic cancer cells (n=2).

**Supplementary Figure 1. PpIX and BPD induce ROS.**

(a) PpIX and BPD induce ROS in Panc1 cells as assessed by HE staining. Pre-treatment with 4  $\mu$ M resveratrol reverted the effect of the compounds. Representative histograms are shown of three independent experiments.

(b) Neither, PpIX nor BPD induces ROS in non-transformed HPDE cells (DCFDA staining).  $H_2O_2$  treatment was used as positive control of ROS induction. Representative histograms are shown of three independent experiments.

**References**

1. GLOBOCAN: **Estimated Cancer Incidence, Mortality and Prevalence Worldwide in 2012**. In. Lyon, France: IARC 2016 2012.
2. Malvezzi M, Bertuccio P, Levi F, La Vecchia C, Negri E: **European cancer mortality predictions for the year 2013**. *Annals of oncology : official journal of the European Society for Medical Oncology / ESMO* 2013, **24**(3):792-800.
3. Carrato A, Falcone A, Ducreux M, Valle JW, Parnaby A, Djazouli K, Alnwick-Allu K, Hutchings A, Palaska C, Parthenaki I: **A Systematic Review**

- of the Burden of Pancreatic Cancer in Europe: Real-World Impact on Survival, Quality of Life and Costs.** *Journal of gastrointestinal cancer* 2015, **46**(3):201-211.
4. Society AC: **Cancer Facts & Figures 2013.** In. Atlanta, USA; 2013.
  5. Giovannetti E, Pacetti P, Reni M, Leon LG, Mambrini A, Vasile E, Ghidini M, Funel N, Lucchesi M, Cereda S *et al*: **Association between DNA-repair polymorphisms and survival in pancreatic cancer patients treated with combination chemotherapy.** *Pharmacogenomics* 2011, **12**(12):1641-1652.
  6. Xiang JF, Wang WQ, Liu L, Xu HX, Wu CT, Yang JX, Qi ZH, Wang YQ, Xu J, Liu C *et al*: **Mutant p53 determines pancreatic cancer poor prognosis to pancreatectomy through upregulation of cavin-1 in patients with preoperative serum CA19-9  $\geq$  1,000 U/mL.** *Scientific reports* 2016, **6**:19222.
  7. Regel I, Hausmann S, Benitz S, Esposito I, Kleeff J: **Pathobiology of pancreatic cancer: implications on therapy.** *Expert review of anticancer therapy* 2016, **16**(2):219-227.
  8. Umemura A, Nitta H, Sasaki A, Takahara T, Hasegawa Y, Wakabayashi G: **Modified FOLFIRINOX for Locally Advanced and Metastatic Pancreatic Cancer Patients Resistant to Gemcitabine and S-1 in Japan: A Single Institutional Experience.** *Hepato-gastroenterology* 2014, **61**(131):814-820.
  9. Puri A, Saif MW: **Pharmacogenomics update in pancreatic cancer.** *JOP : Journal of the pancreas* 2014, **15**(2):114-117.
  10. Maitra A, Hruban RH: **Pancreatic cancer.** *Annual review of pathology* 2008, **3**:157-188.

11. Bykov VJN, Eriksson SE, Bianchi J, Wiman KG: **Targeting mutant p53 for efficient cancer therapy.** *Nature reviews Cancer* 2018, **18**(2):89-102.
12. Celli JP, Solban N, Liang A, Pereira SP, Hasan T: **Verteporfin-based photodynamic therapy overcomes gemcitabine insensitivity in a panel of pancreatic cancer cell lines.** *Lasers in surgery and medicine* 2011, **43**(7):565-574.
13. Xie Q, Jia L, Liu YH, Wei CG: **Synergetic anticancer effect of combined gemcitabine and photodynamic therapy on pancreatic cancer in vivo.** *World journal of gastroenterology : WJG* 2009, **15**(6):737-741.
14. Agostinis P, Berg K, Cengel KA, Foster TH, Girotti AW, Gollnick SO, Hahn SM, Hamblin MR, Juzeniene A, Kessel D *et al*: **Photodynamic therapy of cancer: an update.** *CA: a cancer journal for clinicians* 2011, **61**(4):250-281.
15. Zawacka-Pankau J, Issaeva N, Hossain S, Pramanik A, Selivanova G, Podhajska AJ: **Protoporphyrin IX interacts with wild-type p53 protein in vitro and induces cell death of human colon cancer cells in a p53-dependent and -independent manner.** *The Journal of biological chemistry* 2007, **282**(4):2466-2472.
16. Sznarkowska AK, A.; Kawiak, A.; Acedo, P.; Lion, M.; Inga, A.; Zawacka-Pankau, J.: **Reactivation of TAp73 tumor suppressor by protoporphyrin IX, a metabolite of aminolevulinic acid, induces apoptosis in TP53-deficient cancer cells.** *BioRxiv* <https://doi.org/10.1101/357293> 2018.
17. Arner ESJ: **Targeting the Selenoprotein Thioredoxin Reductase 1 for Anticancer Therapy.** *Advances in cancer research* 2017, **136**:139-151.
18. Prast-Nielsen S, Dexheimer TS, Schultz L, Stafford WC, Cheng Q, Xu J, Jadhav A, Arner ES, Simeonov A: **Inhibition of thioredoxin reductase 1 by**

- porphyrins and other small molecules identified by a high-throughput screening assay.** *Free Radic Biol Med* 2011, **50**(9):1114-1123.
19. Chapman PB, Hauschild A, Robert C, Haanen JB, Ascierto P, Larkin J, Dummer R, Garbe C, Testori A, Maio M *et al*: **Improved survival with vemurafenib in melanoma with BRAF V600E mutation.** *The New England journal of medicine* 2011, **364**(26):2507-2516.
20. Puzanov I, Amaravadi RK, McArthur GA, Flaherty KT, Chapman PB, Sosman JA, Ribas A, Shackleton M, Hwu P, Chmielowski B *et al*: **Long-term outcome in BRAF(V600E) melanoma patients treated with vemurafenib: Patterns of disease progression and clinical management of limited progression.** *European journal of cancer* 2015, **51**(11):1435-1443.
21. Gabeff R, Dutartre H, Khammari A, Boisrobert A, Nguyen JM, Quereux G, Brocard A, Saint-Jean M, Peuvrel L, Dreno B: **Phototoxicity of B-RAF inhibitors: Exclusively due to UVA radiation and rapidly regressive.** *European journal of dermatology : EJD* 2015, **25**(5):452-456.
22. Klaeger S, Gohlke B, Perrin J, Gupta V, Heinzlmeir S, Helm D, Qiao H, Bergamini G, Handa H, Savitski MM *et al*: **Chemical Proteomics Reveals Ferrochelatase as a Common Off-target of Kinase Inhibitors.** *ACS chemical biology* 2016.
23. Stafford WC, Peng X, Olofsson MH, Zhang X, Luci DK, Lu L, Cheng Q, Tresaugues L, Dexheimer TS, Coussens NP *et al*: **Irreversible inhibition of cytosolic thioredoxin reductase 1 as a mechanistic basis for anticancer therapy.** *Science translational medicine* 2018, **10**(428).

24. Hedstrom E, Eriksson S, Zawacka-Pankau J, Arner ES, Selivanova G: **p53-dependent inhibition of TrxR1 contributes to the tumor-specific induction of apoptosis by RITA.** *Cell cycle* 2009, **8**(21):3584-3591.
25. Peng X, Zhang MQ, Conserva F, Hosny G, Selivanova G, Bykov VJ, Arner ES, Wiman KG: **APR-246/PRIMA-1MET inhibits thioredoxin reductase 1 and converts the enzyme to a dedicated NADPH oxidase.** *Cell death & disease* 2013, **4**:e881.
26. Sachweh MC, Stafford WC, Drummond CJ, McCarthy AR, Higgins M, Campbell J, Brodin B, Arner ES, Lain S: **Redox effects and cytotoxic profiles of MJ25 and auranofin towards malignant melanoma cells.** *Oncotarget* 2015, **6**(18):16488-16506.
27. Lambert JM, Gorzov P, Veprintsev DB, Soderqvist M, Segerback D, Bergman J, Fersht AR, Hainaut P, Wiman KG, Bykov VJ: **PRIMA-1 reactivates mutant p53 by covalent binding to the core domain.** *Cancer cell* 2009, **15**(5):376-388.
28. Zhang Q, Bykov VJN, Wiman KG, Zawacka-Pankau J: **APR-246 reactivates mutant p53 by targeting cysteines 124 and 277.** *Cell death & disease* 2018, **9**(5):439.
29. Varfaj F, Lampe JN, Ortiz de Montellano PR: **Role of cysteine residues in heme binding to human heme oxygenase-2 elucidated by two-dimensional NMR spectroscopy.** *J Biol Chem* 2012, **287**(42):35181-35191.
30. Furukawa T, Duguid WP, Rosenberg L, Viallet J, Galloway DA, Tsao MS: **Long-term culture and immortalization of epithelial cells from normal adult human pancreatic ducts transfected by the E6E7 gene of human**

- papilloma virus 16.** *The American journal of pathology* 1996, **148**(6):1763-1770.
31. Kostecka A, Sznarkowska A, Meller K, Acedo P, Shi Y, Mohammad Sakil HA, Kawiak A, Lion M, Krolicka A, Wilhelm M *et al*: **JNK-NQO1 axis drives TAp73-mediated tumor suppression upon oxidative and proteasomal stress.** *Cell death & disease* 2014, **5**:e1484.
32. Arner ES, Zhong L, Holmgren A: **Preparation and assay of mammalian thioredoxin and thioredoxin reductase.** *Methods in enzymology* 1999, **300**:226-239.
33. Rengby O, Johansson L, Carlson LA, Serini E, Vlamis-Gardikas A, Karsnas P, Arner ES: **Assessment of production conditions for efficient use of Escherichia coli in high-yield heterologous recombinant selenoprotein synthesis.** *Applied and environmental microbiology* 2004, **70**(9):5159-5167.
34. Shi Y, Nikulenkov F, Zawacka-Pankau J, Li H, Gabdoulline R, Xu J, Eriksson S, Hedstrom E, Issaeva N, Kel A *et al*: **ROS-dependent activation of JNK converts p53 into an efficient inhibitor of oncogenes leading to robust apoptosis.** *Cell Death Differ* 2014, **21**(4):612-623.

Figure 1

a.

Panc1

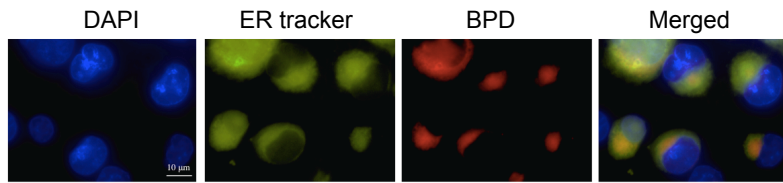

b.

PaCa3

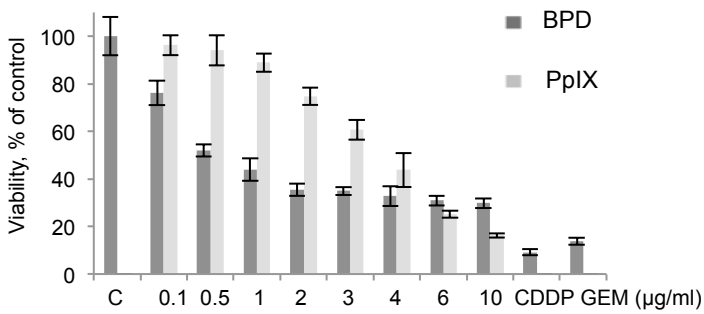

b.

Panc1

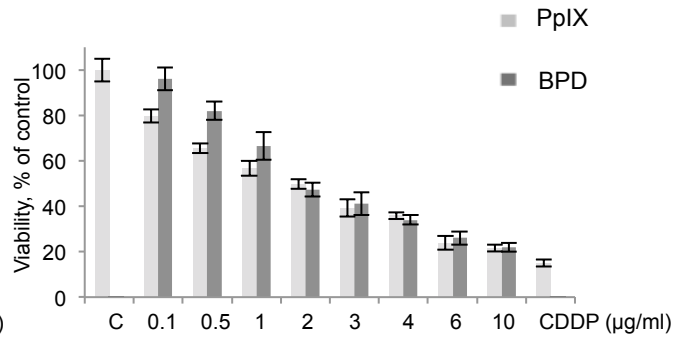

d.

PancO2

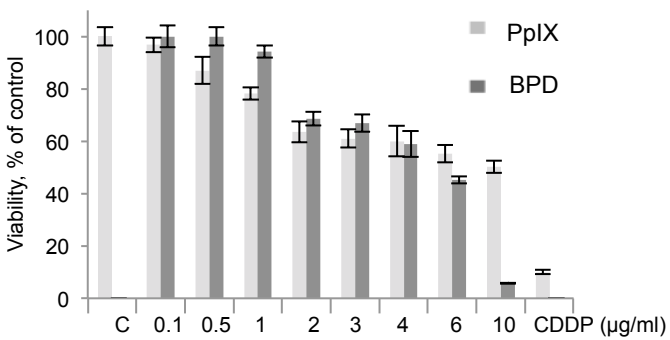

e.

HPDE

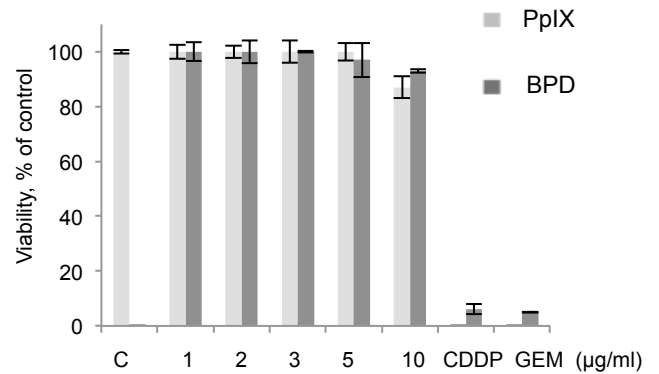

Figure 2

a.

PaCa3

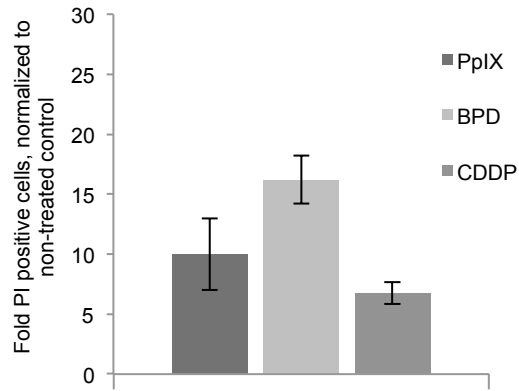

b.

Fold Annexin positive cells, normalized to non-treated control

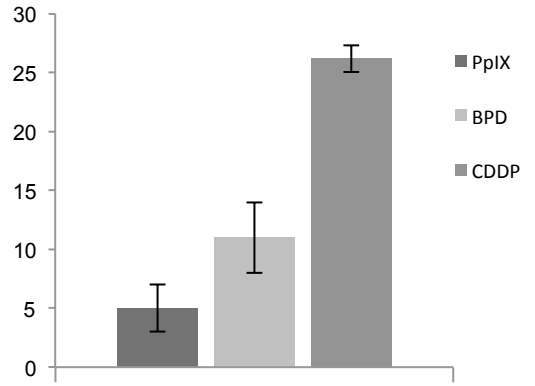

c.

Panc1

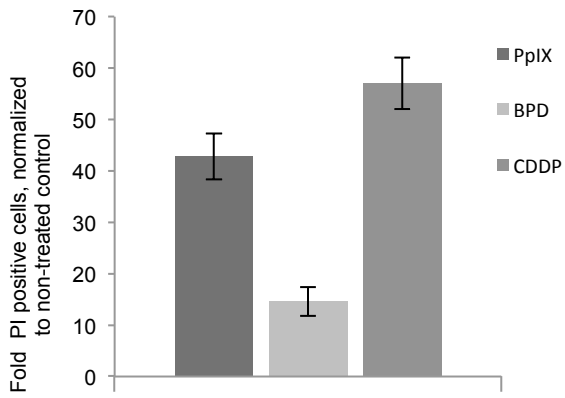

d.

Fold Annexin positive cells, normalized to non-treated control

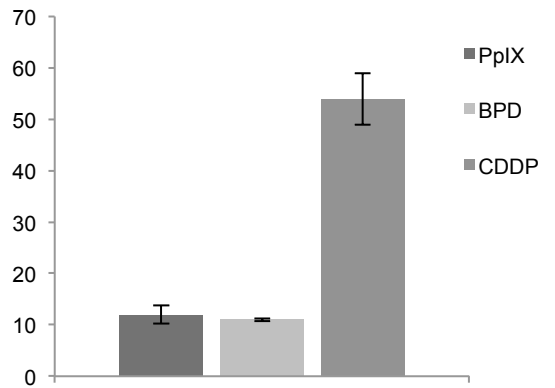



Figure 3

a. PaCa3

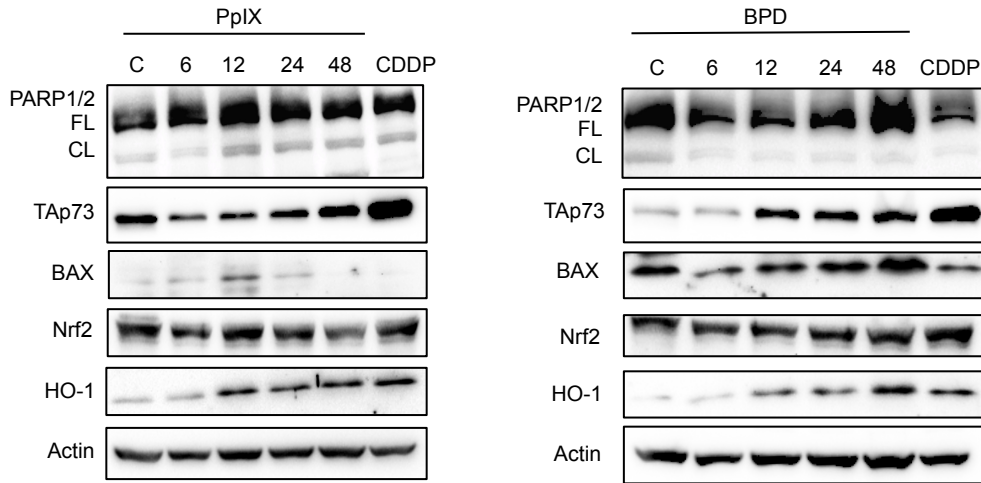

b. Panc1

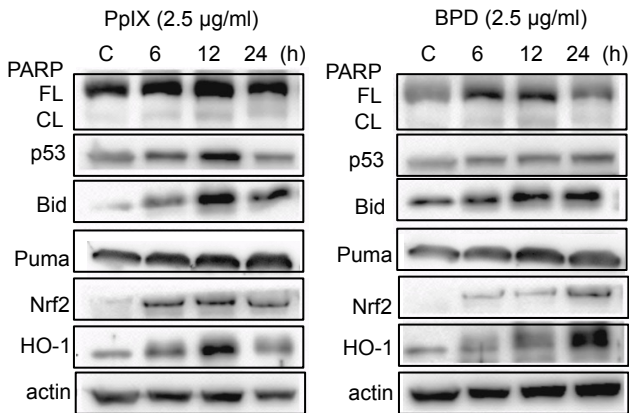

c. Panc1

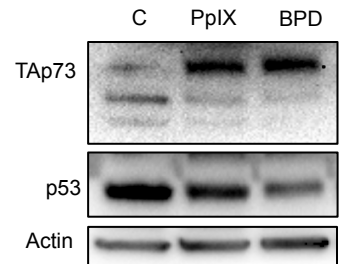

d. Panc1

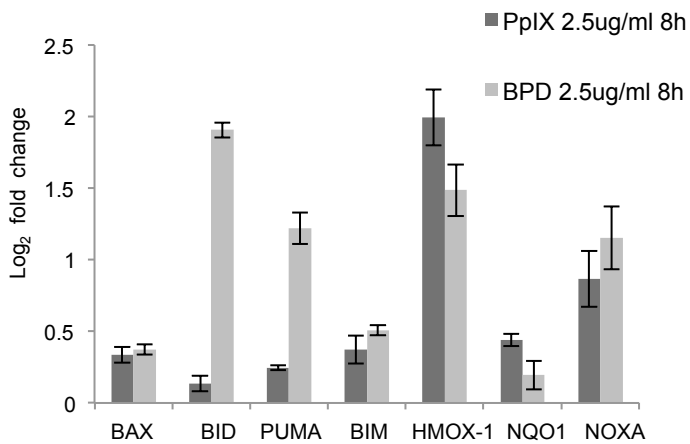

e. HPDE

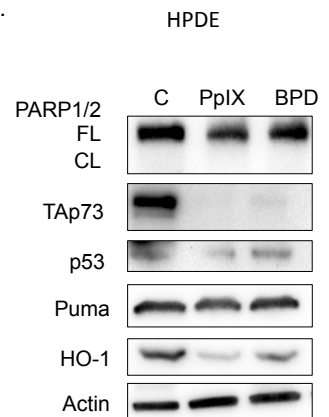

Figure 4

a.

PaCa3

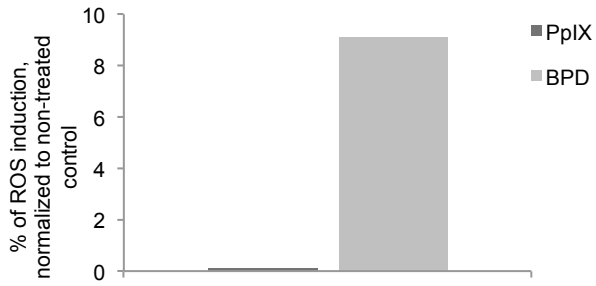

b.

Panc1

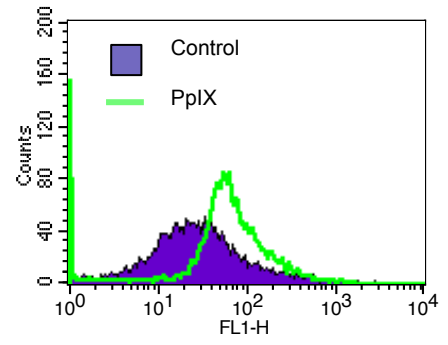

c.

Panc1

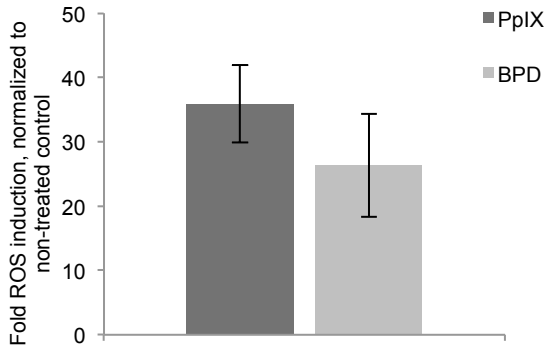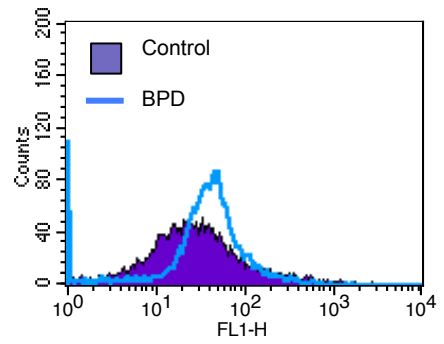

Figure 5

a.

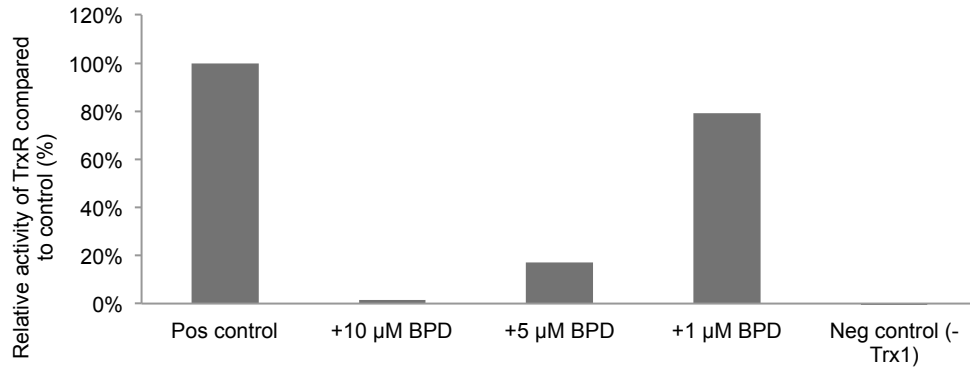

b.

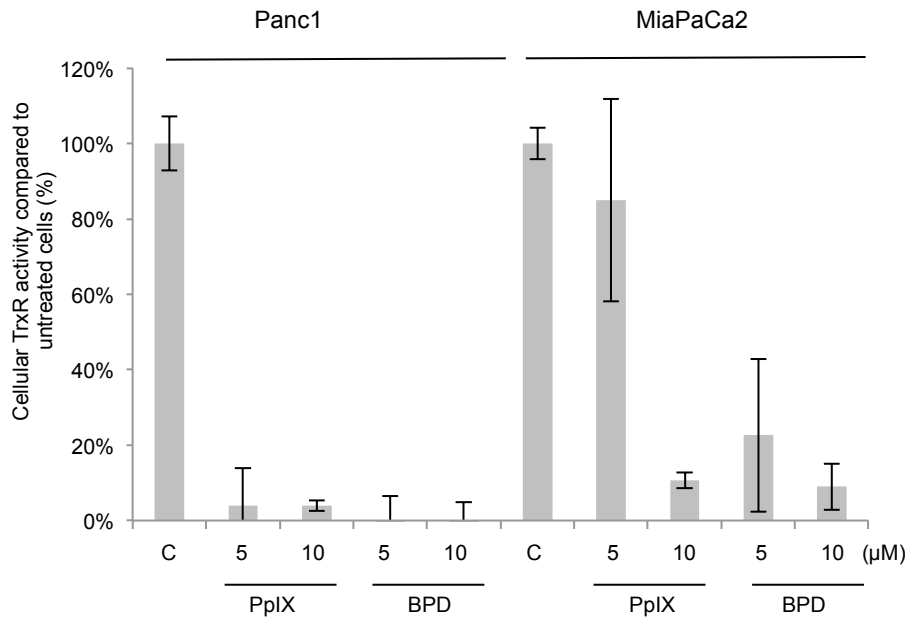

Supplementary figure 1

a. Panc1

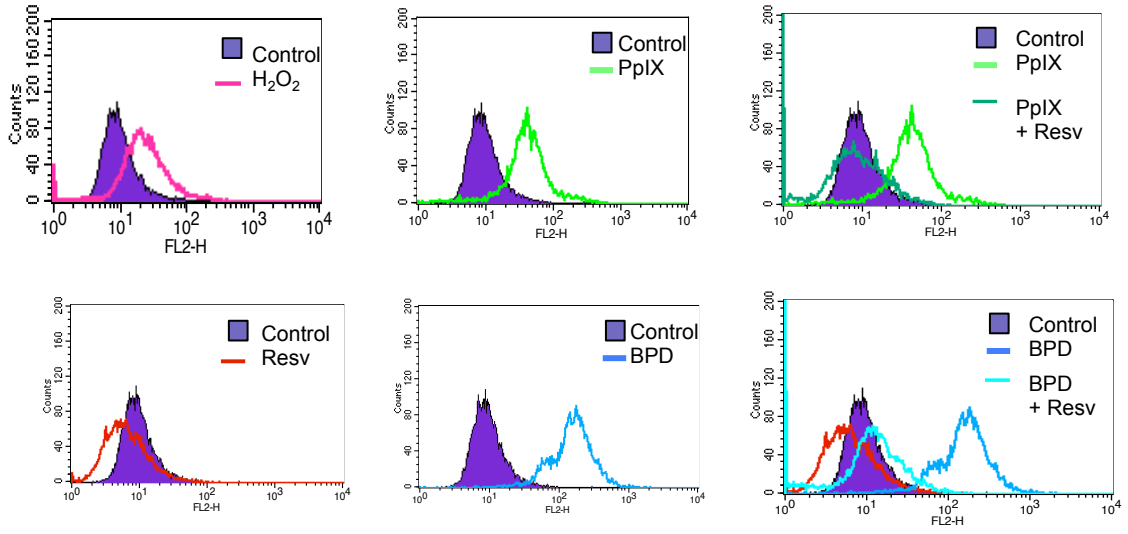

b. HPDE

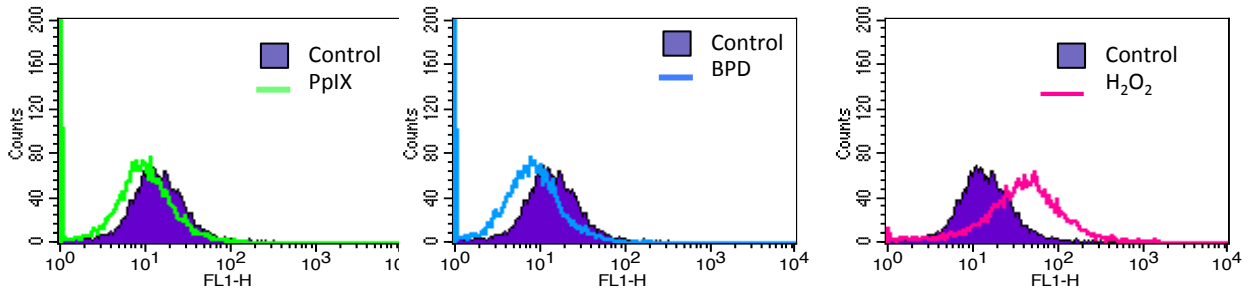

Source: https://www.biorxiv.org/content/10.1101/398750v1.full.pdf
